# Supplementary material for: Automated digital TIL analysis (ADTA) adds prognostic value to standard assessment of depth and ulceration in primary melanoma
Source: PubMed Central journal article supplement (PMC7854647; doi:10.1038/s41598-021-82305-1), 2021-02-02
Supplement: 41598_2021_82305_MOESM1_ESM.pdf [file 41598_2021_82305_MOESM1_ESM.pdf]

**Title:** Automated digital TIL analysis (ADTA) adds prognostic value to standard assessment of depth and ulceration in primary melanoma

**Authors:** Michael R. Moore\*, Isabel D. Friesner\*, Emanuelle M. Rizk\*, Benjamin T. Fullerton, Manas Mondal, Megan H. Trager, Karen Mendelson, Ijeuru Chikeka, Tahsin Kurc, Rajarsi Gupta, Bethany R. Rohr, Eric J. Robinson, Balazs Acs, Rui Chang, Harriet Kluger, Bret Taback, Larisa J. Geskin, Basil Horst, Kevin Gardner, George Niedt, Julide T. Celebi, Robyn D. Gartrell-Corrado, Jane Messina, Tammie Ferringer, David L. Rimm, Joel Saltz, Jing Wang\*\*, Rami Vanguri\*\*, Yvonne M. Saenger\*\*

\*These authors contributed equally to this work

\*\*These authors contributed equally to this work

**Supplemental Table 1.** Univariable Cox regression analysis of disease-specific survival on Training cohort, including pathology TIL grade, depth, ulceration, and sentinel lymph node biopsy (SLNB) status.

Univariable cox analysis using training cohort.

|                             | <b>Hazard ratio</b> | <b>95% CI</b> | <b><i>P</i></b> |
|-----------------------------|---------------------|---------------|-----------------|
| <b>Pathology TIL grade*</b> | 0.35                | 0.00-0.95     | 0.039           |
| <b>Depth</b>                | 1.32                | 0.78-2.25     | 0.306           |
| <b>Ulceration</b>           | 2.47                | 0.91-6.73     | 0.076           |
| <b>SLNB*</b>                | 2.98                | 1.04-8.55     | 0.043           |

**Supplemental Table 2.** Validation demographics, separated by institution.

|                                                | <b>Yale</b>      | <b>Geisinger</b> |
|------------------------------------------------|------------------|------------------|
| <b>Clinical characteristics</b>                | <b>(n = 100)</b> | <b>(n = 45)</b>  |
| Sex, <i>n</i> (%)                              |                  |                  |
| Male                                           | 48 (48.0)        | 24 (53.3)        |
| Female                                         | 52 (52.0)        | 21 (46.7)        |
| Age                                            |                  |                  |
| Median, <i>n</i> (range)                       | 61 (25-84)       | 65 (20-90)       |
| Location of tumor, <i>n</i> (%)                |                  |                  |
| Trunk                                          | N/A              | 29 (64.4)        |
| Extremity                                      | N/A              | 16 (35.6)        |
| <b>Pathologic characteristics</b>              |                  |                  |
| Depth (mm)                                     |                  |                  |
| Median, <i>n</i> (range)                       | 2.3 (0.2-8.3)    | 3.5 (0.7-13.0)   |
| Ulceration, <i>n</i> (%)                       |                  |                  |
| Absent                                         | 61 (61.0)        | 25 (55.6)        |
| Present                                        | 39 (39.0)        | 20 (44.4)        |
| Unknown                                        | 0 (0.0)          | 0 (0.0)          |
| TILs                                           |                  |                  |
| Absent                                         | 6 (6.0)          | 11 (24.5)        |
| Non-brisk                                      | 76 (76.0)        | 32 (71.1)        |
| Brisk                                          | 18 (18.0)        | 1 (2.2)          |
| Unknown                                        | 0 (0.0)          | 1 (2.2)          |
| Microsatellite lesions, <i>n</i> (%)           |                  |                  |
| Absent                                         | 75 (75.0)        | 39 (86.7)        |
| Present                                        | 25 (25.0)        | 6 (13.3)         |
| Unknown                                        | 0 (0.0)          | 0 (0.0)          |
| <b>Staging Characteristics</b>                 |                  |                  |
| T-stage, <i>n</i> (%)                          |                  |                  |
| T1a or T1b                                     | 22 (22.0)        | 1 (2.2)          |
| T2a                                            | 14 (14.0)        | 0 (0.0)          |
| T2b or T3a                                     | 28 (28.0)        | 16 (35.6)        |
| T3b or T4a                                     | 22 (22.0)        | 18 (40.0)        |
| T4b                                            | 14 (14.0)        | 10 (22.2)        |
| Unknown                                        | 0 (0.0)          | 0 (0.0)          |
| SLNB status, <i>n</i> (%)                      |                  |                  |
| Completed                                      | 0 (0.0)          | 40 (88.9)        |
| Positive, <i>n</i> (% of completed)            | 0 (0.0)          | 20 (50.0)        |
| Negative, <i>n</i> (% of completed)            | 0 (0.0)          | 20 (50.0)        |
| Not completed                                  | 0 (0.0)          | 5 (11.1)         |
| Unknown                                        | 100 (100.0)      | 0 (0.0)          |
| Stage, <i>n</i> (%)                            |                  |                  |
| I                                              | 30 (30.0)        | 1 (2.2)          |
| II                                             | 45 (45.0)        | 21 (46.7)        |
| III                                            | 25 (25.0)        | 23 (51.1)        |
| <b>Outcome characteristics</b>                 |                  |                  |
| Patient follow-up (months)                     |                  |                  |
| Median, <i>n</i> (range)                       | 68.7 (1.4-456.2) | 76.0 (9-142)     |
| DMR, <i>n</i> (%)                              |                  |                  |
| Distant recurrence                             | 44 (44.0)        | 25 (55.6)        |
| No distant recurrence or local recurrence only | 56 (56.0)        | 20 (44.4)        |
| OS, <i>n</i> (%)                               |                  |                  |
| Alive (at least 2 years)                       | 26 (26.0)        | 22 (48.9)        |
| Dead                                           | 74 (74.0)        | 23 (51.1)        |
| DSS, <i>n</i> (%)                              |                  |                  |
| Alive or NED at death                          | 56 (56.0)        | 26 (57.8)        |
| Median follow-up (months)                      | 114.4            | 94.0             |
| Dead with melanoma                             | 44 (44.0)        | 19 (42.2)        |
| Median follow-up (months)                      | 39.0             | 28.0             |
| Unknown                                        | 0 (0.0)          | 0 (0.0)          |

Abbreviations: DMR, distant metastatic recurrence; DSS, disease-specific survival; NED, no evidence of disease; OS, overall survival

**Supplemental Figure 1. ADTA correlated with pathologist TIL grading.** Correlation

between ADTA score and pathologist TIL grading defined as absent, non-brisk, or brisk

for (a) Yale cohort ( $\rho=0.345$ ,  $p<0.001$  using Spearman's rank correlation coefficient) and

(b) Geisinger cohort ( $\rho=0.354$ ,  $p=0.019$  using Spearman's rank correlation coefficient).

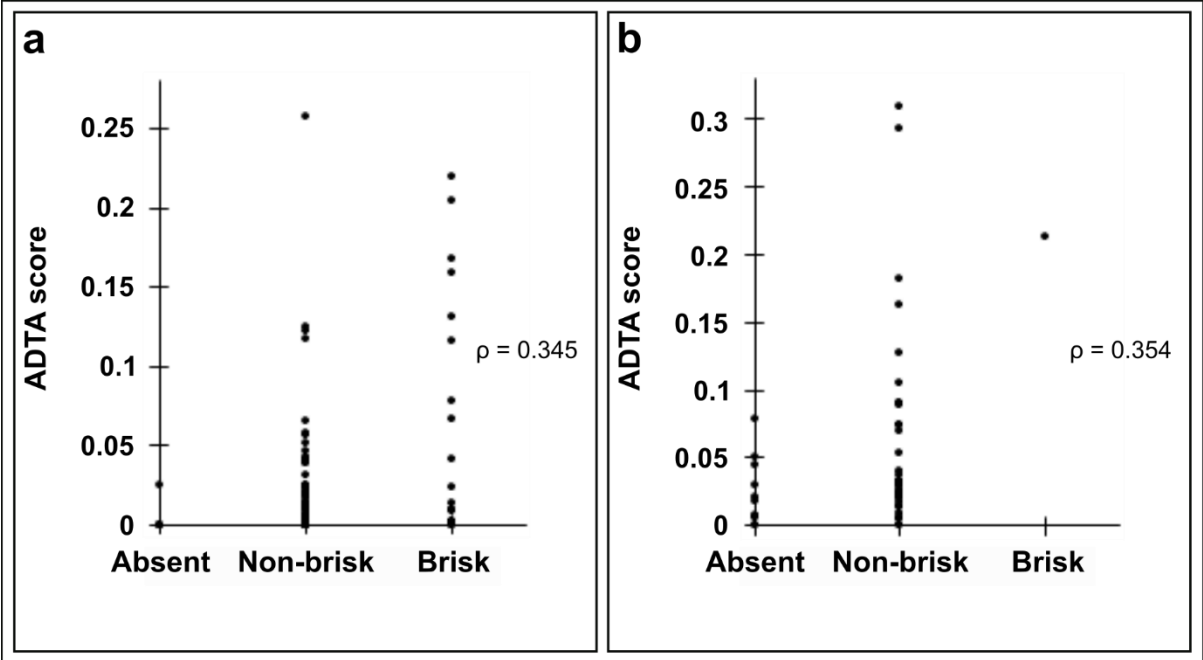

**Supplementary Figure 2. ADTA score distributed by pathologist TIL grade.** (a) Analysis of variance between ADTA scores of all patients stratified by their corresponding patient TIL grade (Kruskal-Wallis,  $p < 0.0001$ ; Dunn multiple comparison  $p$  values of 0.1850 for Absent vs. Non-brisk,  $< 0.0001$  for Absent vs. Brisk, and 0.0002 for Non-brisk vs. Brisk). (b) Distribution of ADTA scores by TIL grade within the training (CUIMC) and validation (GHS and YMS) cohorts. (c) Distribution of ADTA scores by TIL grade within each institution.

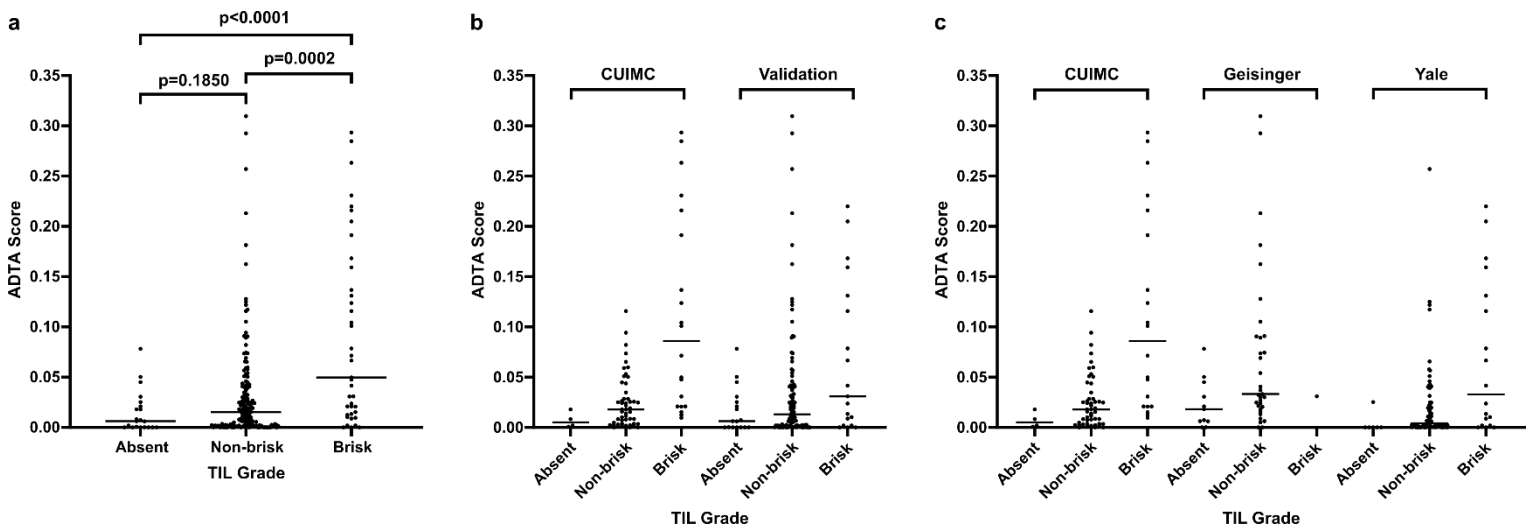

**Supplemental Figure 3. ADTA performance on Yale and Geisinger populations, individually.** KM curves for disease-specific survival on (a) Yale population ( $p=0.0139$  using log rank (Mantel-Cox) test) and (b) Geisinger population ( $p=0.0141$  using log rank (Mantel-Cox) test).

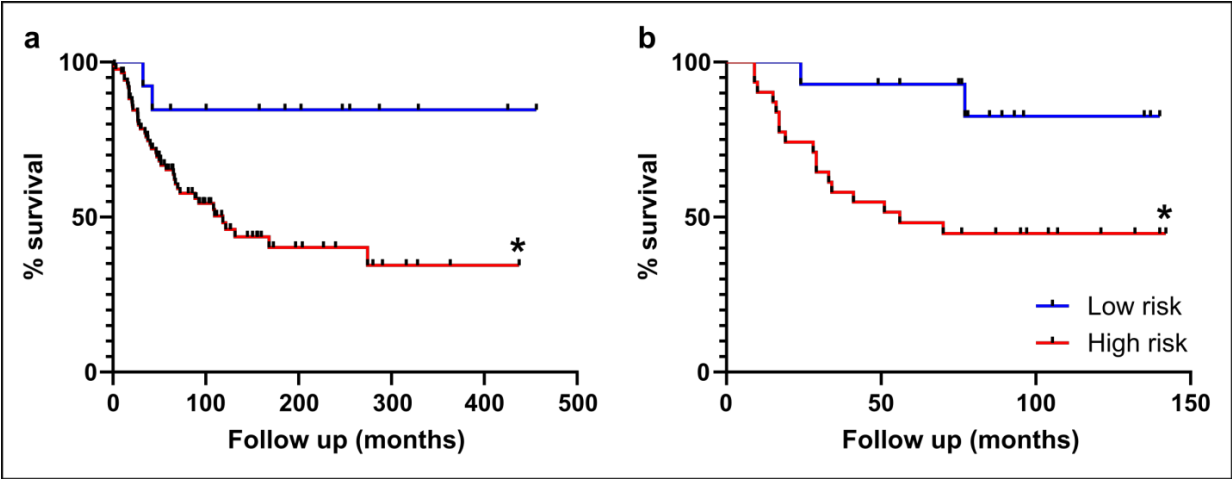

**Supplemental Table 3.** Univariable Cox regression analysis of disease-specific survival on Yale and Geisinger cohorts, including ADTA, depth, ulceration, T-stage, pathology TIL grade, and SLNB status.

Univariable cox analysis using validation cohort.

|                            | <b>Yale</b>                  |                 | <b>Geisinger</b>             |                 |
|----------------------------|------------------------------|-----------------|------------------------------|-----------------|
|                            | <b>Hazard ratio (95% CI)</b> | <b><i>P</i></b> | <b>Hazard ratio (95% CI)</b> | <b><i>P</i></b> |
| <b>ADTA</b>                | 5.01 (1.21-20.80)            | 0.027           | 5.17 (1.19-22.41)            | 0.028           |
| <b>Depth</b>               | 1.59 (1.17-2.16)             | 0.003           | 1.54 (0.76-3.11)             | 0.231           |
| <b>Ulceration</b>          | 1.34 (0.74-2.44)             | 0.333           | 2.86 (1.03-7.96)             | 0.044           |
| <b>T-Stage</b>             | 1.22 (1.07-1.40)             | 0.004           | 1.36 (0.97-1.90)             | 0.071           |
| <b>Pathology TIL grade</b> | 0.50 (0.00-0.95)             | 0.035           | 0.78 (0.31-1.98)             | 0.598           |
| <b>SLNB</b>                | N/A                          | N/A             | 1.51 (0.57-3.97)             | 0.406           |

**Supplemental Table 4.** Multivariable Cox regression analysis of disease-specific survival on validation cohort, including pathology TIL grade, depth, and ulceration.

Multivariable cox analysis using validation cohort.

|                            | <b>Hazard ratio</b> | <b>95% CI</b> | <b><i>P</i></b> |
|----------------------------|---------------------|---------------|-----------------|
| <b>Pathology TIL grade</b> | 0.79                | 0.46-1.38     | 0.414           |
| <b>Depth*</b>              | 1.40                | 1.03-1.89     | 0.031           |
| <b>Ulceration</b>          | 1.29                | 0.77-2.18     | 0.335           |



**Supplemental Table 5.** Multivariable Cox regression analysis of disease-specific survival on validation cohort, including ADTA and stage.

Multivariable cox analysis using validation cohort.

|                | <b>Hazard ratio</b> | <b>95% CI</b> | <b><i>P</i></b> |
|----------------|---------------------|---------------|-----------------|
| <b>ADTA**</b>  | 4.61                | 1.67-12.71    | 0.003           |
| <b>Stage**</b> | 1.77                | 1.24-2.53     | 0.002           |
